# Supplementary material
Source: PubMed Central journal article supplement (PMC3097279)
Supplement: NIHMS266386-supplement-Supp_Data.pdf [file NIHMS266386-supplement-Supp_Data.pdf]

# CHEMISTRY

---

## A EUROPEAN JOURNAL

---

### Supporting Information

© Copyright Wiley-VCH Verlag GmbH & Co. KGaA, 69451 Weinheim, 2011

#### **Modeling the *cis*-Oxo-Labile Binding Site Motif of Non-Heme Iron Oxygenases: Water Exchange and Oxidation Reactivity of a Non-Heme Iron(IV)-Oxo Compound Bearing a Tripodal Tetradentate Ligand**

**Anna Company,<sup>[a, e]</sup> Irene Prat,<sup>[a]</sup> Jonathan R. Frisch,<sup>[b]</sup> Dr Ruben Mas-Ballesté,<sup>[b]</sup> Mireia Güell,<sup>[c]</sup> Gergely Juhász,<sup>[d]</sup> Xavi Ribas,<sup>[a]</sup> Dr Eckard Münck,<sup>\*,[d]</sup> Josep M. Luis,<sup>\*,[c]</sup> Lawrence Que, Jr.,<sup>\*,[b]</sup> and Miquel Costas<sup>\*,[a]</sup>**

chem\_201002297\_sm\_miscellaneous\_information.pdf

## 1. Instrumentation

Product analyses were performed on a Shimadzu GC-2010 gas chromatograph (Cyclodex-B column, 30 m) and a flame ionization detector. GC-MS spectral analyses were performed on a ThermoQuest Trace GC 2000 Series chromatograph interfaced with a Finnigan ThermoQuest Trace MS mass spectrometer. The products were identified by comparison of their GC retention times and GC-MS with those of authentic compounds. NMR spectra were taken on Bruker DPX200 and DPX400 spectrometers. High-resolution electrospray mass spectrometry (ESI-MS) was performed on a Bruker (Billerica, MA) BioTOF II time-of-flight spectrometer. Exact-mass data were acquired using polypropylene glycol or polyethylene glycol as an internal standard. UV-vis spectroscopy was performed on a Cary 50 Scan (Varian) UV-vis spectrophotometer with 1 cm or 0.2 cm quartz cells. The low temperature control was performed with a cryostat from Unisoku Scientific Instruments (Japan). Mössbauer spectra were recorded with two spectrometers, using Janis Research Super-Varitemp dewars that allowed studies in applied magnetic fields up to 8.0 T in the temperature range from 1.5 to 200 K. Mössbauer spectral simulations were performed using the WMOSS software package (WEB Research, Edina, MN). Isomer shifts are quoted relative to Fe metal at 298 K. Resonance Raman spectra were collected on an Acton AM-506 spectrometer (1200 groove grating) using a Kaiser Optical holographic super-notch filters with a Princeton Instruments liquid-N<sub>2</sub>-cooled (LN-1100PB) CCD detector with a 4 cm<sup>-1</sup> spectral resolution.

## 2. Characterization of compound 2

### Mössbauer spectroscopy

A  $^{57}\text{Fe}$  sample of **2** for Mössbauer spectroscopy was prepared by reaction of  $[\text{}^{57}\text{Fe}(\text{CF}_3\text{SO}_3)_2(\text{}^{\text{Me,H}}\text{Pytacn})]$  (**1**) with 2 equiv peracetic acid in acetonitrile at 15°C. The  $^{57}\text{Fe}$  enriched sample of **1** was synthesized following the reported experimental procedure<sup>1</sup> but using  $^{57}\text{Fe}(\text{CF}_3\text{SO}_3)_2(\text{CH}_3\text{CN})_2$  as the iron source.

**Figure S1.** Left: Field dependence of the Mössbauer spectra of **2** at 4.2 K. Right: Temperature dependence of the Mössbauer spectra of **2** at 8 T. Black line: experimental data. Red line: simulated spectrum after subtraction of the intensity corresponding to the fast relaxing species **3** (which accounts for 15% of the sample).

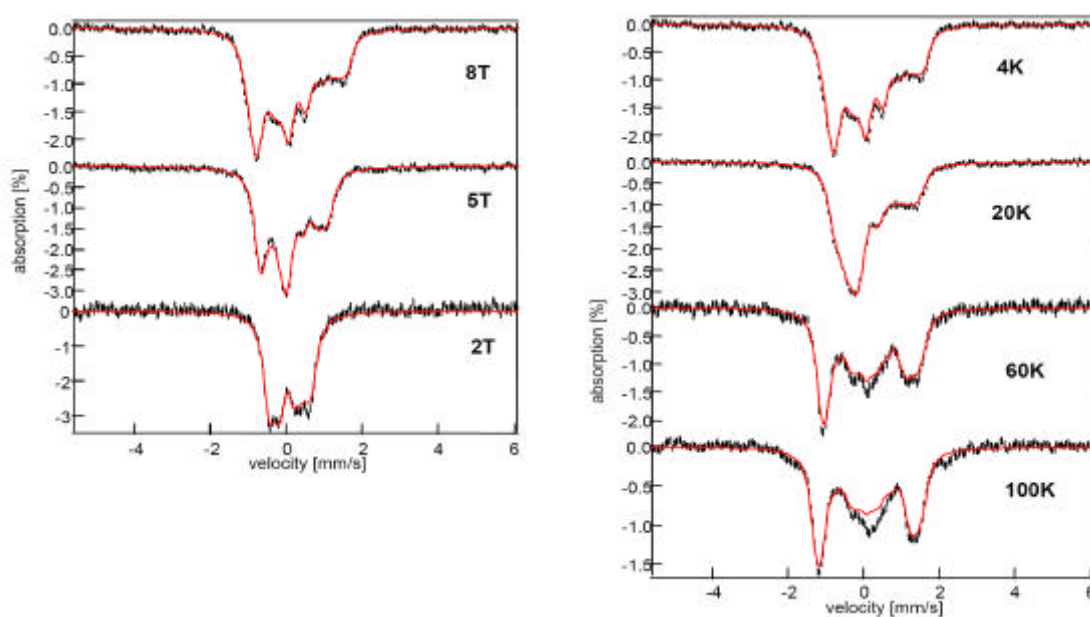

### rRaman spectroscopy

**Figure S2.** Resonance Raman spectra of **2** before (red line) and after reaction with  $\text{H}_2^{18}\text{O}$  (blue line) ( $\lambda_{\text{exc}} = 407.9 \text{ nm}$ ).

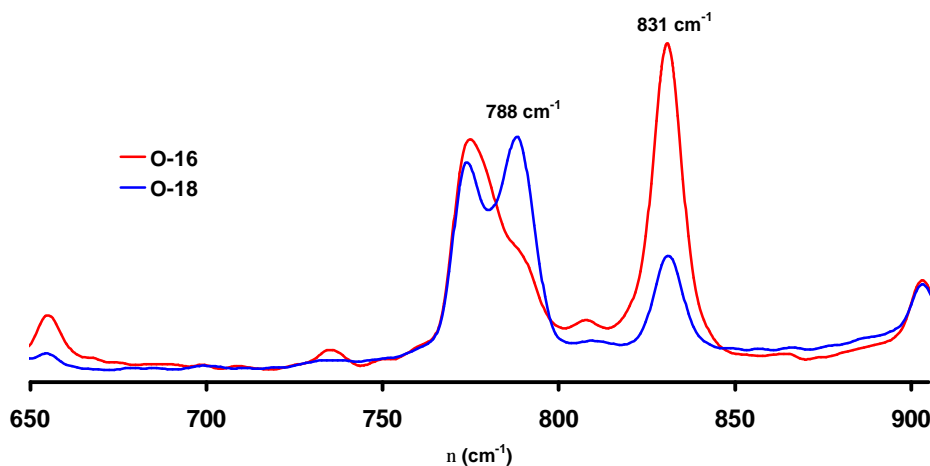

## NMR spectroscopy

**Figure S3.**  $^1\text{H}$ -NMR spectra of **1** (bottom), **2** (top) and **3** (middle) at 298K in  $\text{CD}_3\text{CN}$ . For compound **2** the spectrum shows a single set of sharp signals at 42, 10 and -13 ppm.

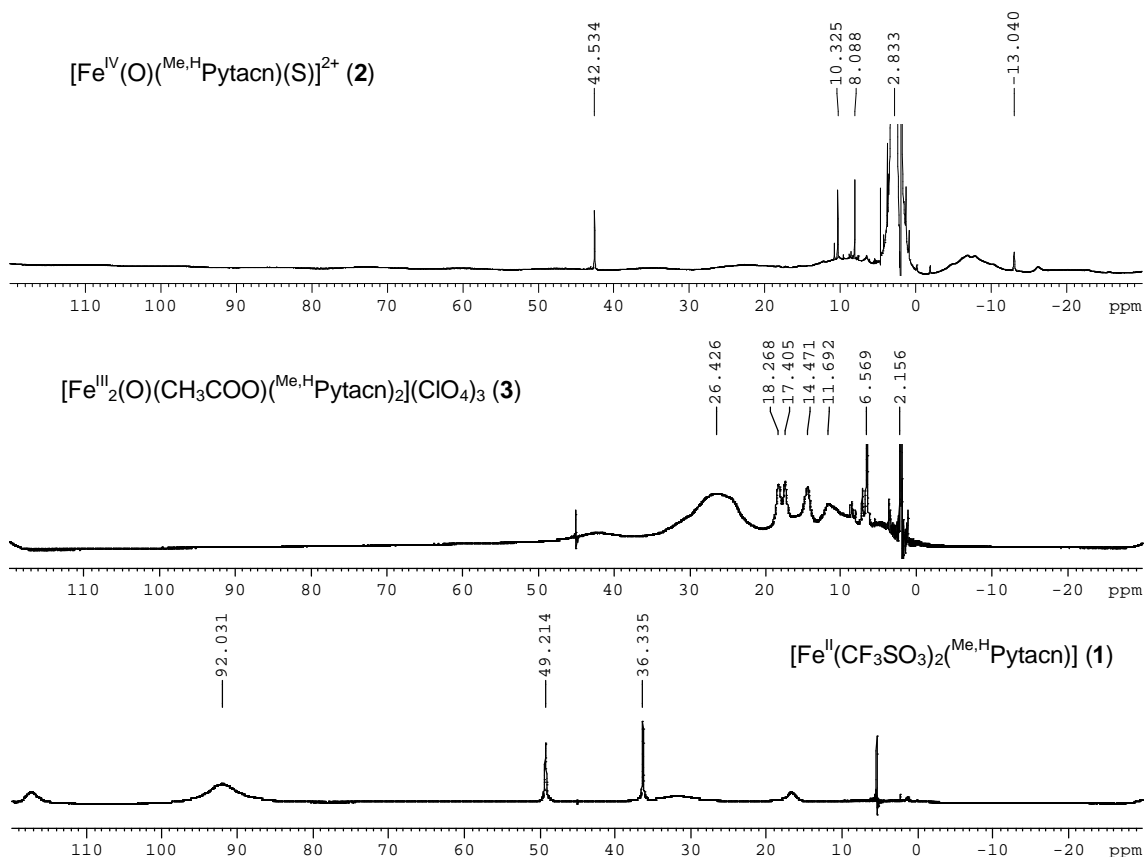

Experimental procedure for the preparation of the NMR sample of **2**: 5.4 mg of  $[\text{Fe}(\text{CF}_3\text{SO}_3)_2(\text{Me,HPytacn})]$  (**1**) (9  $\mu\text{mol}$ s) were dissolved in 1.2 mL  $\text{CD}_3\text{CN}$  and 20  $\mu\text{L}$   $\text{D}_2\text{O}$ . To the resulting solution 20  $\mu\text{L}$  of a 0.95 M peracetic acid solution in  $\text{CD}_3\text{CN}$  (19  $\mu\text{mol}$ s) were added at once under stirring. The resulting solution was quickly transferred to a NMR tube and the  $^1\text{H}$ -NMR spectrum was recorded.

### 3. Characterization of the decomposition species (3)

Thermal decay of **2** leads to a new species **3** that could be identified as  $[\text{Fe}^{\text{III}}_2(\mu\text{-O})(\mu\text{-CH}_3\text{COO})(^{\text{Me,H}}\text{Pytacn})_2]^{3+}$  (**3**) by means of UV-vis spectroscopy, ESI-MS and comparison with an independently prepared sample, characterized by X-ray crystallography.

**Figure S4.** UV-vis spectrum of the species derived from thermal decomposition of **2** recorded in  $\text{CH}_3\text{CN}$  at room temperature. Inset: ESI-MS spectrum.

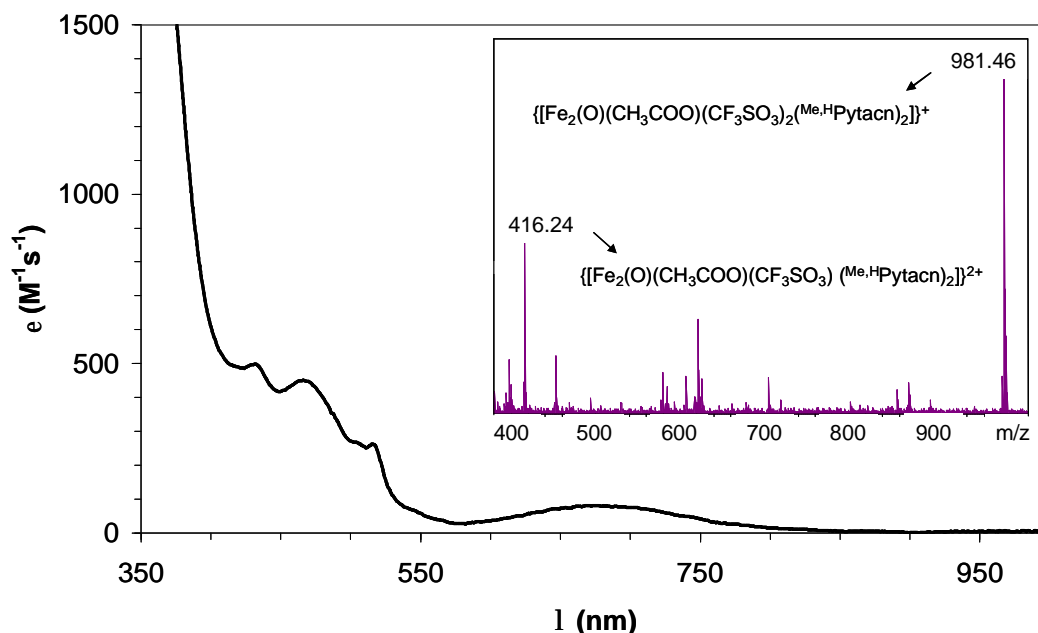

#### Direct preparation of $[\text{Fe}^{\text{III}}_2(\mu\text{-O})(\mu\text{-CH}_3\text{COO})(^{\text{Me,H}}\text{Pytacn})_2](\text{ClO}_4)_3 \cdot \text{CH}_3\text{CN}$ (**3-CH<sub>3</sub>CN**)

Synthesis of  $[\text{Fe}^{\text{III}}_2(\mu\text{-O})(\mu\text{-CH}_3\text{COO})(^{\text{Me,H}}\text{Pytacn})_2](\text{ClO}_4)_3 \cdot \text{CH}_3\text{CN}$  (**3-CH<sub>3</sub>CN**). 54.6 mg of compound **1** (90  $\mu\text{mol}$ s) were dissolved in  $\text{CH}_3\text{CN}$  (2 mL) under an inert atmosphere. 200  $\mu\text{L}$  of an acetonitrile solution 0.30 M in  $\text{CH}_3\text{COOH}$  and  $\text{Et}_3\text{N}$  (60  $\mu\text{mol}$ s  $\text{CH}_3\text{COOH}$  and  $\text{Et}_3\text{N}$ ) were added at once, which caused an immediate color change from dark pink to bright yellow. Immediately a balloon filled with  $\text{O}_2$  was connected into the reaction vessel and the solution became red-brown in a few seconds. After stirring for 3 h, the solvent from the resulting solution was removed under reduced pressure affording a brown oil. The resulting product was dissolved in acetonitrile and 19 mg  $\text{NaClO}_4 \cdot \text{H}_2\text{O}$  (135  $\mu\text{mol}$ s) were added. The solution was stirred for about 2 hours, filtered through Celite<sup>®</sup> and diethyl ether was slowly diffused. 37 mg of brown crystals of **3-CH<sub>3</sub>CN** suitable for X-ray diffraction were obtained (38  $\mu\text{mol}$ s, 84%). FT-IR (ATR)  $\nu$ ,  $\text{cm}^{-1}$ : 1611, 1523 ( $\text{CH}_3\text{COO}$ ), 1447 ( $\text{C}=\text{C}_{\text{ar}}$ ), 1073, 621 ( $\text{ClO}_4$ ).  $^1\text{H-NMR}$  ( $\text{CDCl}_3$ , 200 MHz, 300K)  $\delta$ , ppm: 26.43, 18.27, 17.41, 14.47, 6.57. ESI-MS ( $m/z$ ): 227.6  $[\text{M}-3\text{ClO}_4]^{3+}$ , 880.9  $[\text{M}-\text{ClO}_4]^+$ . UV-vis ( $\text{CH}_3\text{CN}$ )  $\lambda_{\text{max}}$ , nm ( $\epsilon/\text{Fe}$ ,  $\text{M}^{-1} \cdot \text{cm}^{-1}$ ): 427 (660), 462 (690), 513 (500), 692 (58).

**Crystal-structure determination.** Crystals of  $\text{C}_{32}\text{H}_{54}\text{Cl}_3\text{Fe}_2\text{N}_9\text{O}_{15}$  were grown from slow diffusion of diethyl ether into a  $\text{CH}_3\text{CN}$  solution of the compound, and used for low temperature (100(2)K) X-ray structure determination. The measurement was carried out on a BRUKER SMART APEX CCD diffractometer using graphite-monochromated Mo  $\text{K}\alpha$  radiation ( $\lambda =$

0.71073 Å) from an X-Ray Tube. The measurements were made in the range 2.18 to 27.90° for  $\theta$ . Full-sphere data collection was carried out with  $\omega$  and  $\phi$  scans. A total of 61751 reflections were collected of which 10087 [R(int) = 0.0534] were unique. Programs used: data collection, Smart version 5.631 (Bruker AXS 1997-02); data reduction, Saint + version 6.36A (Bruker AXS 2001); absorption correction, SADABS version 2.10 (Bruker AXS 2001). Structure solution and refinement was done using SHELXTL Version 6.14 (Bruker AXS 2000-2003). The structure was solved by direct methods and refined by full-matrix least-squares methods on  $F^2$ . The non-hydrogen atoms were refined anisotropically. The hydrogen-atoms were placed in geometrically optimized positions and forced to ride on the atom to which they are attached.

**Table S1.** Crystal data for **3-CH<sub>3</sub>CN**.

|                                    |                                                                                                          |
|------------------------------------|----------------------------------------------------------------------------------------------------------|
| Empirical formula                  | C <sub>32</sub> H <sub>54</sub> Cl <sub>3</sub> Fe <sub>2</sub> N <sub>9</sub> O <sub>15</sub>           |
| Formula weight                     | 1022.89                                                                                                  |
| Temperature                        | 100(2) K                                                                                                 |
| Wavelength                         | 0.71073 Å                                                                                                |
| Crystal system                     | Monoclinic                                                                                               |
| Space group                        | P 21/n                                                                                                   |
| Unit cell dimensions               | a = 15.417(3) Å $\alpha$ = 90°<br>b = 15.465(2) Å $\beta$ = 90.807(3)°<br>c = 17.759(3) Å $\gamma$ = 90° |
| Volume                             | 4233.8(12) Å <sup>3</sup>                                                                                |
| Density (calculated)               | 1.605 g·cm <sup>-3</sup>                                                                                 |
| Absorption coefficient             | 0.952 mm <sup>-1</sup>                                                                                   |
| F(000)                             | 2128                                                                                                     |
| Cell formula units_Z               | 4                                                                                                        |
| Crystal size                       | 0.5 x 0.3 x 0.1 mm                                                                                       |
| $\theta$ range for data collection | 2.18 to 27.90°                                                                                           |
| Limiting indices                   | -20 ≤ h ≤ 20, -20 ≤ k ≤ 20, -23 ≤ l ≤ 23                                                                 |
| Reflections collected              | 61751                                                                                                    |
| Independent reflections            | 10087 [R(int) = 0.0534]                                                                                  |
| Completeness to $\theta$           | 99.7% ( $\theta$ = 27.90°)                                                                               |
| Refinement method                  | Full-matrix least-squares on $F^2$                                                                       |
| Data / restraints / parameters     | 10087 / 7 / 584                                                                                          |
| Goodness-of-fit on $F^2$           | 1.115                                                                                                    |
| Final R indices [I > 2σ(I)]        | R1 = 0.0727, wR2 = 0.2234                                                                                |
| R indices (all data)               | R1 = 0.0819, wR2 = 0.2290                                                                                |
| Largest diff. peak and hole        | 2.846 and -0.735 e. Å <sup>-3</sup>                                                                      |

**Table S2.** Selected bond lengths (Å) and angles (°) for **3-CH<sub>3</sub>CN**.

|        |          |           |            |           |            |
|--------|----------|-----------|------------|-----------|------------|
| Fe1-N1 | 2.167(4) | O1-Fe1-O3 | 95.42(15)  | O1-Fe2-O2 | 96.68(15)  |
| Fe1-N2 | 2.225(4) | O1-Fe1-N4 | 99.75(16)  | O2-Fe2-N6 | 85.54(15)  |
| Fe1-N3 | 2.180(4) | N2-Fe1-N4 | 80.46(16)  | N6-Fe2-N8 | 79.92(16)  |
| Fe1-N4 | 2.197(4) | N2-Fe1-O3 | 85.06(15)  | O1-Fe2-N8 | 98.33(16)  |
| Fe1-O1 | 1.801(3) | N1-Fe1-O1 | 100.02(16) | N7-Fe2-N8 | 80.58(16)  |
| Fe1-O3 | 2.062(4) | N1-Fe1-N2 | 73.99(16)  | N6-Fe2-N7 | 77.70(15)  |
| Fe2-N5 | 2.163(4) | N1-Fe1-N4 | 89.67(16)  | O1-Fe2-N7 | 106.51(15) |
| Fe2-N6 | 2.247(4) | N1-Fe1-O3 | 93.34(15)  | O2-Fe2-N7 | 89.95(15)  |
| Fe2-N7 | 2.196(4) | N3-Fe1-O1 | 106.61(16) | O1-Fe2-N5 | 101.21(16) |
| Fe2-N8 | 2.184(4) | N3-Fe1-O3 | 89.53(15)  | O2-Fe2-N5 | 90.70(16)  |
| Fe2-O1 | 1.805(3) | N3-Fe1-N4 | 80.70(16)  | N5-Fe2-N6 | 74.45(16)  |
| Fe2-O2 | 2.017(3) | N2-Fe1-N3 | 79.36(16)  | N5-Fe2-N8 | 91.72(16)  |

## 4. Oxygen-atom exchange with water

**Figure S5.** Plot of  $k_{\text{obs}}$  versus the concentration of  $\text{H}_2^{18}\text{O}$  for the oxygen-atom exchange between **2** and  $\text{H}_2^{18}\text{O}$  at 295K.

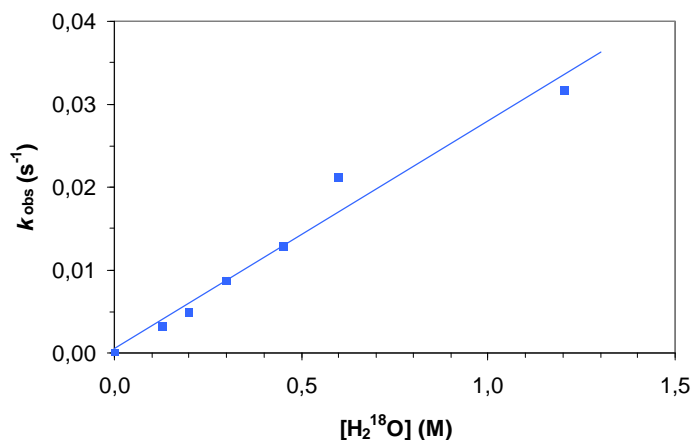

**Table S3.** Second order rate constants obtained in the oxygen-atom exchange of **2** (1 mM) with  $\text{H}_2^{18}\text{O}$  (0.2 M) at different temperatures. Activation parameters obtained by fitting  $\ln(k_{\text{exc}}/T)$  against  $1/T$ :  $\Delta H^\ddagger = 10.2 \pm 0.8 \text{ kcal}\cdot\text{mol}^{-1}$  and  $\Delta S^\ddagger = -32 \pm 3 \text{ cal}\cdot\text{K}^{-1}\cdot\text{mol}^{-1}$

| T (K) | $k_{\text{obs}}$ ( $\text{s}^{-1}$ ) | $k_{\text{exc}}$ ( $\text{M}^{-1}\text{s}^{-1}$ ) |
|-------|--------------------------------------|---------------------------------------------------|
| 304.5 | $0.00850 \pm 0.0002$                 | 0.043                                             |
| 295.0 | $0.0050 \pm 0.0006$                  | 0.025                                             |
| 284.0 | $0.0021 \pm 0.0001$                  | 0.0103                                            |
| 275.0 | $0.00135 \pm 0.00004$                | 0.0068                                            |

## 5. Sulfide oxidation: oxygen-atom transfer

**Figure S6.** UV-vis spectral changes of **2** upon addition of 5 equiv thioanisole. Experimental reaction conditions: to a solution of **2** (1 mM), 5 equiv of thioanisole (from a 70 mM acetonitrile solution) were added at once at 0 °C and the kinetics were monitored at 750 nm (inset).

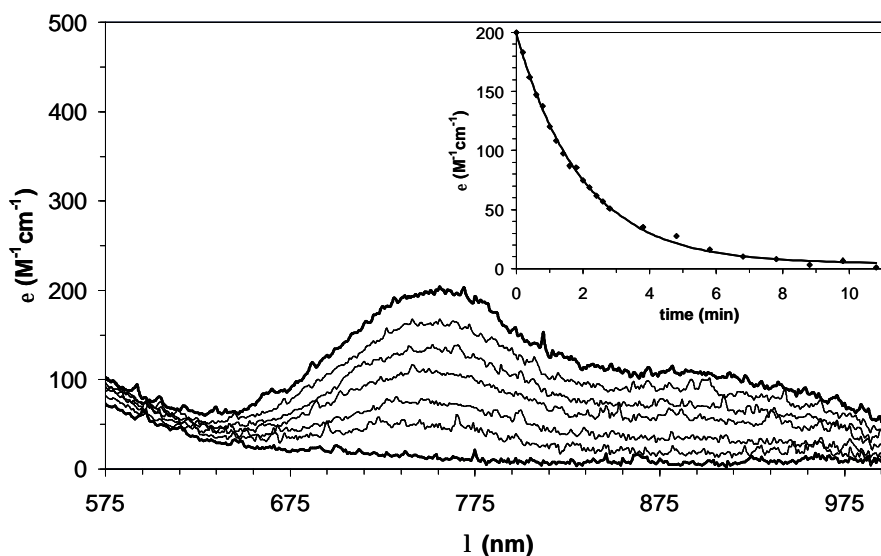

**Figure S7.** Plot of  $k_{\text{obs}}$  against substrate concentration for the reaction of **2** (1 mM) at 0 °C with *p*-X-thioanisoles (the slope of each line corresponds to the second-order rate constant,  $k_2$ ). X = CH<sub>3</sub>O (yellow), CH<sub>3</sub> (blue), H (purple), Cl (red) and CN (green).

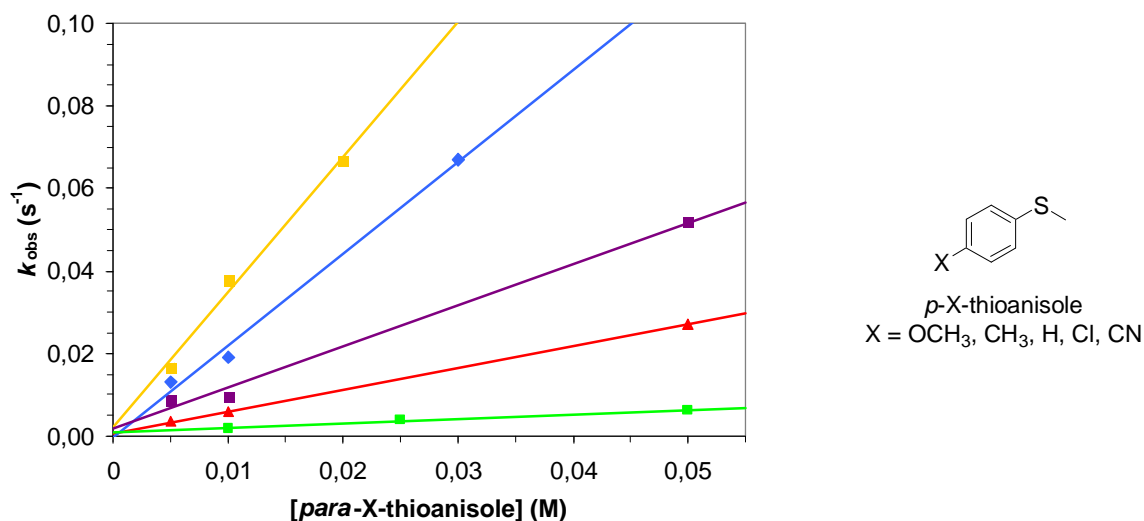

**Table S4.** Second-order rate constants ( $k_2$ ) determined in the reaction of **2** with *p*-X thioanisoles.

| X                | $E_{\text{ox}}^{\circ}$ vs. SCE (V) <sup>a</sup> | $\sigma_p$ <sup>b</sup> | $k_X$ (M <sup>-1</sup> s <sup>-1</sup> ) <sup>c</sup> |
|------------------|--------------------------------------------------|-------------------------|-------------------------------------------------------|
| OCH <sub>3</sub> | 1.13                                             | -0.27                   | 2.6 ± 0.3                                             |
| CH <sub>3</sub>  | 1.24                                             | -0.17                   | 2.2 ± 0.2                                             |
| H                | 1.34                                             | 0.00                    | 1.0 ± 0.1                                             |
| Cl               | 1.37                                             | 0.23                    | 0.53 ± 0.01                                           |
| CN               | 1.61                                             | 0.66                    | 0.11 ± 0.01                                           |

<sup>a</sup>One-electron oxidation potentials for *p*-X-thioanisoles. Data obtained from reference 2. <sup>b</sup>Hammett parameters. <sup>c</sup>Second-order rate constants in the reaction of **2** with *p*-X-thioanisoles.

**Figure S8.** Plot of  $\log(k_X)$  against the one-electron oxidation potentials ( $E_{\text{ox}}^{\circ}$ ) of *p*-X-thioanisoles. A linear correlation with a slope of -3.0 is obtained.

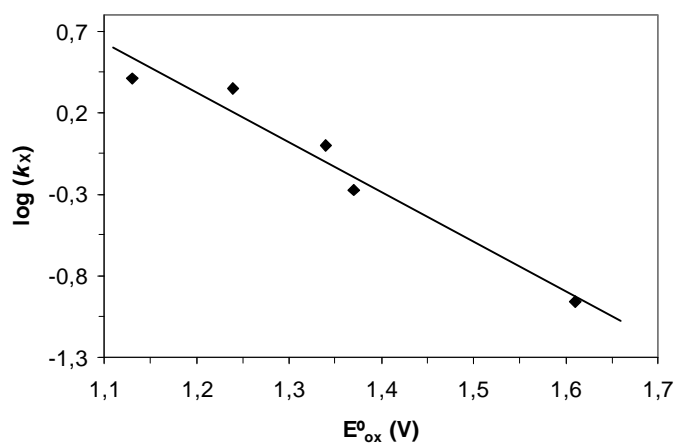



## 6. Oxidation of activated C-H bonds: hydrogen-atom abstraction

**Figure S9.** Plot of  $k_{\text{obs}}$  against substrate concentration for the reaction of **2** (1 mM) at -15 °C with xanthene (yellow), DHA (blue), CHD (red), fluorene (green), 2,3-dimethylbutane (purple) and THF (brown) (the slope of each line corresponds to the second-order rate constant,  $k_2$ ).

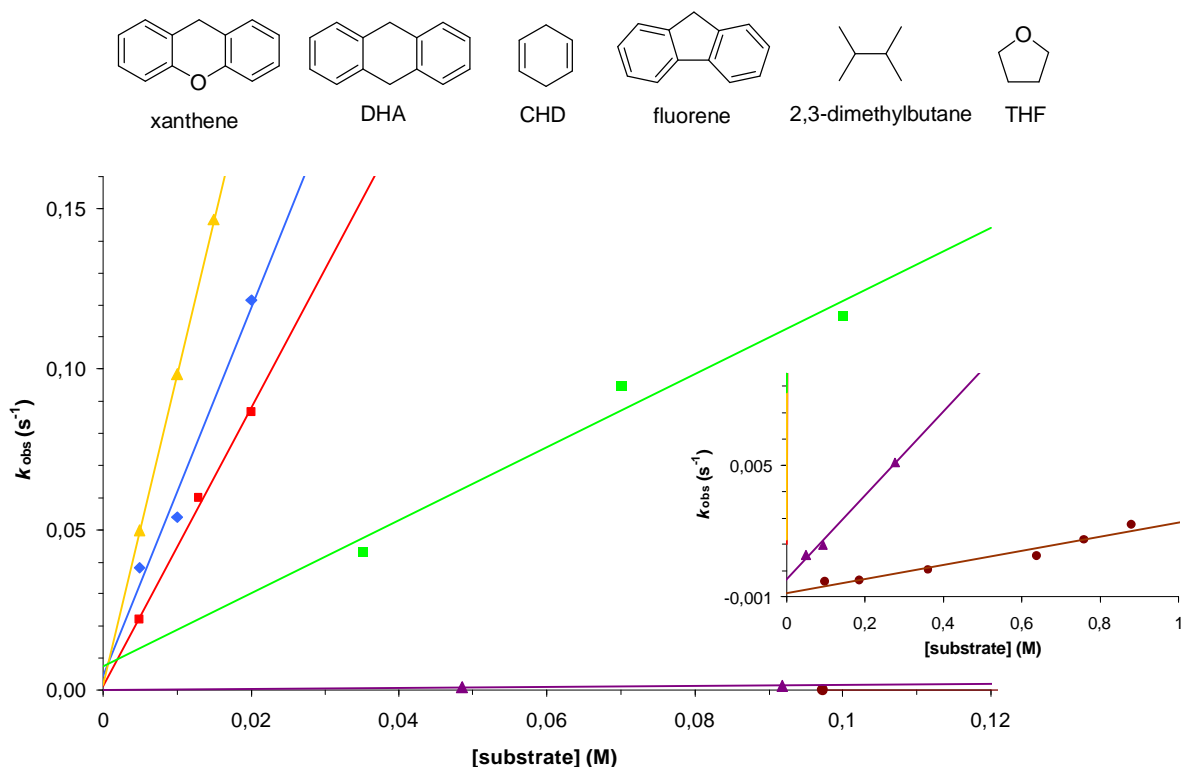

### Determination of the kinetic isotope effect (KIE)

**Dihydroanthracene (DHA).** An exact amount of DHA or D<sub>4</sub>-DHA (diluted in 200  $\mu\text{L}$  acetonitrile) were added at once under stirring to a 2 mL of a 1 mM solution of **2** (2  $\mu\text{mol}$ s) in acetonitrile at -15°C. Reactions were monitored by UV-vis spectroscopy by following the decay of the absorption band at  $\lambda = 750 \text{ nm}$  which was fitted to a single exponential function. Plotting the obtained  $k_{\text{obs}}$  against substrate concentration gave a second-order rate constants ( $k_2$ ) of  $5.7 \pm 0.9 \text{ M}^{-1}\text{s}^{-1}$  and  $0.21 \pm 0.2 \text{ M}^{-1}\text{s}^{-1}$  for DHA and D<sub>4</sub>-DHA respectively. Dividing the obtained rate constants, a KIE value of 27 was obtained for the reaction of **2** with DHA at -15°C.

The deuterated substrate D<sub>4</sub>-9,10-dihydroanthracene (D<sub>4</sub>-DHA) was prepared following the procedure described in the literature with slight modifications thereof.<sup>3</sup> NaH 60% in mineral oil (0.33 g, 8.2 mmols) was added to a mixture of 9,10-dihydroanthracene (0.5 g, 2.7 mmol) in D<sub>6</sub>-DMSO (3 mL) under an inert atmosphere. The resulting deep red mixture was stirred at room temperature for 8 h and the reaction was quenched by careful addition of D<sub>2</sub>O (5 mL). The crude product was filtered and washed with copious amounts of H<sub>2</sub>O (20 mL). The resulting pink

solid was treated with H<sub>2</sub>O (5 mL) and extracted with CH<sub>2</sub>Cl<sub>2</sub> (3 x 5 mL). The combined organic layers were dried over MgSO<sub>4</sub> and filtered. The solvent was removed under reduced pressure to yield 0.45 g of a pale pink solid corresponding to D<sub>4</sub>-9,10-dihydroanthracene (2.4 mmols, 89%). <sup>1</sup>H-NMR spectroscopy confirmed 98% deuteration. <sup>1</sup>H-NMR (CDCl<sub>3</sub>, 200 MHz, 300K) δ, ppm: 7.32 – 7.27 (m, 4H, ArH), 7.21 – 7.16 (m, 4H, ArH).

**Figure S10.** Plot of  $k_{\text{obs}}$  against substrate concentration for the reaction of **2** with DHA (blue line) and D<sub>4</sub>-DHA (red line) at -15°C (the slope of each line corresponds to the second-order rate constant,  $k_2$ ).

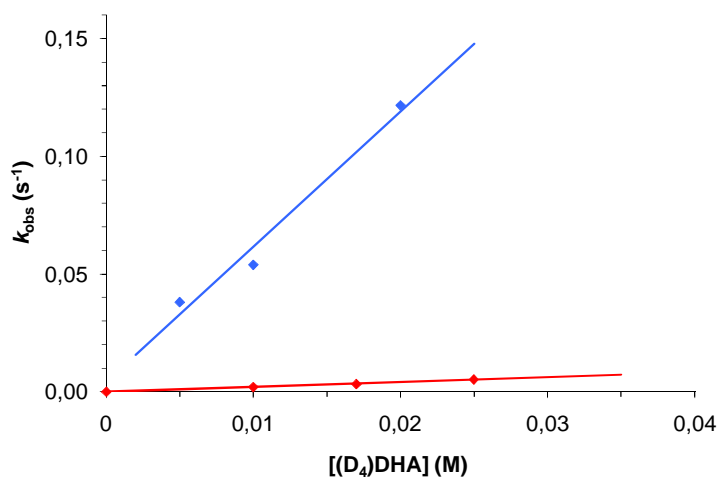

**9,10-dihydro-10-methylacridine (AcrH<sub>2</sub>).** An exact amount of AcrH<sub>2</sub> or AcrD<sub>2</sub> (diluted in acetonitrile) were added at once under stirring to a 1.2 mL of a 1 mM solution of **2** (1.2 μmols) in acetonitrile at -15 °C. Reactions were monitored by UV-vis spectroscopy by following the decay of the absorption band at  $\lambda = 750$  nm which was fitted to a single exponential function. Plotting the obtained  $k_{\text{obs}}$  against substrate concentration gave a second-order rate constants ( $k_2$ ) for AcrH<sub>2</sub> and AcrD<sub>2</sub> respectively. Dividing the obtained rate constants, a KIE value of 3.5 was obtained for the reaction of **2** with AcrH<sub>2</sub> at -15 °C.

The deuterated substrate [9,9<sup>1</sup>-D<sub>2</sub>]-10-methylacridine (AcrD<sub>2</sub>) was synthesized according to the procedure described in the literature.<sup>4</sup>

**Figure S11.** Plot of  $k_{\text{obs}}$  against substrate concentration for the reaction of **2** with  $\text{AcrH}_2$  (blue line) and  $\text{AcrD}_2$  (red line) at  $-15^\circ\text{C}$  (the slope of each line corresponds to the second-order rate constant,  $k_2$ ).

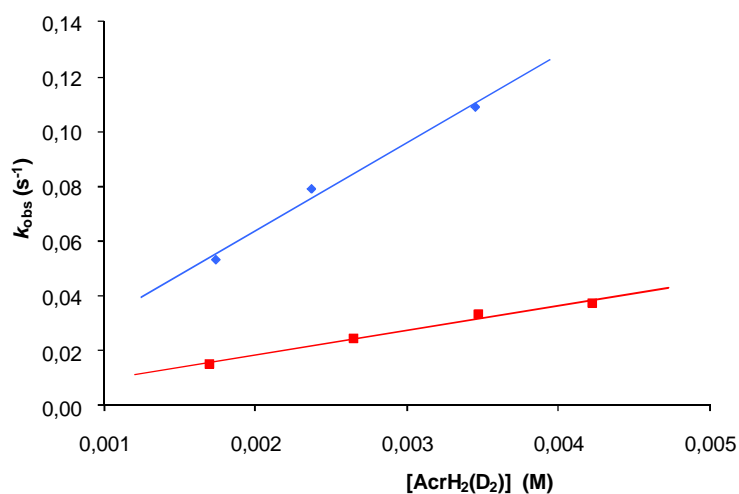

## 7. DFT calculations

Figures S12-S20 show the optimized structures studied in this work calculated at the B3LYP.

**Figure S12:** Structure of **2a** calculated at the B3LYP level of theory in junction of the SDD basis set and associated ECP for Fe, 6-311G(d) basis set for the atoms bond to Fe, and 6-31G basis set for the other atoms.

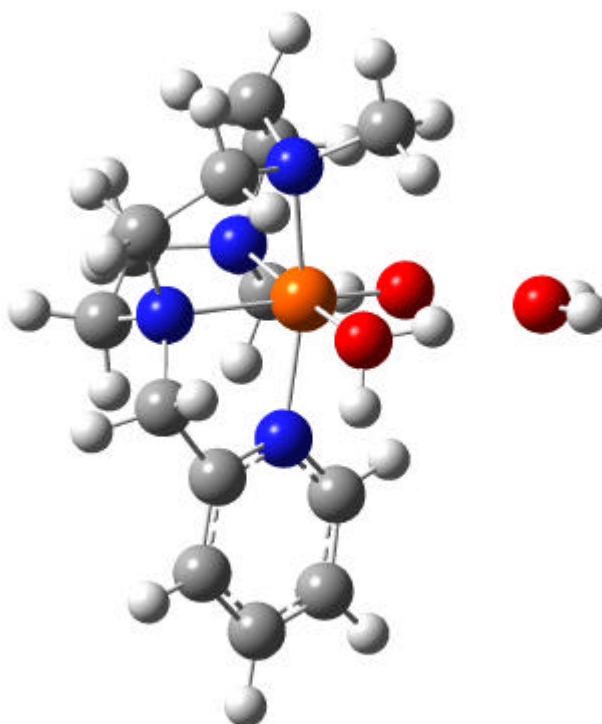

**Figure S13:** Structure of **2b** calculated at the B3LYP level of theory in junction of the SDD basis set and associated ECP for Fe, 6-311G(d) basis set for the atoms bond to Fe, and 6-31G basis set for the other atoms.

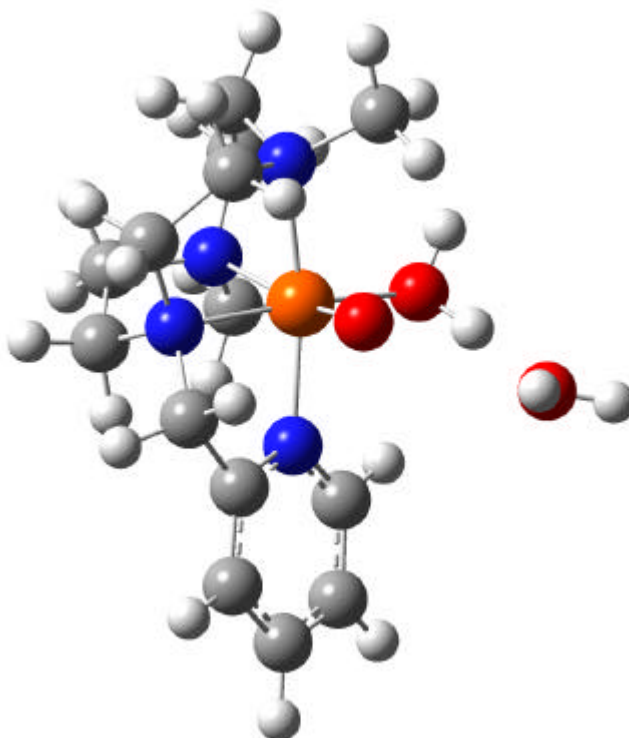

**Figure S14:** Structure of  $[\text{Fe}^{\text{IV}}(\text{O})(^{\text{Me,H}}\text{Pytacn})(\text{H}_2\text{O})]^{2+} + \text{H}_2\text{O} + \text{CH}_3\text{CN}$  calculated at the B3LYP level of theory in junction of the SDD basis set and associated ECP for Fe, 6-311G(d) basis set for the atoms bond to Fe, and 6-31G basis set for the other atoms.

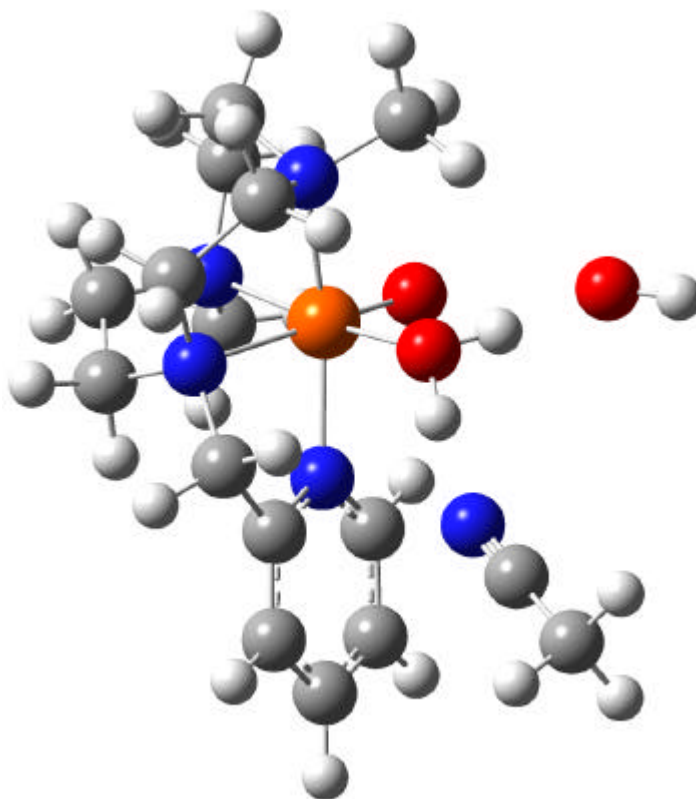

**Figure S15:** Structure of  $[\text{Fe}^{\text{IV}}(\text{O})(^{\text{Me,H}}\text{Pytacn})(\text{CH}_3\text{CN})]^{2+} + 2\text{H}_2\text{O}$  calculated at the B3LYP level of theory in junction of the SDD basis set and associated ECP for Fe, 6-311G(d) basis set for the atoms bond to Fe, and 6-31G basis set for the other atoms.

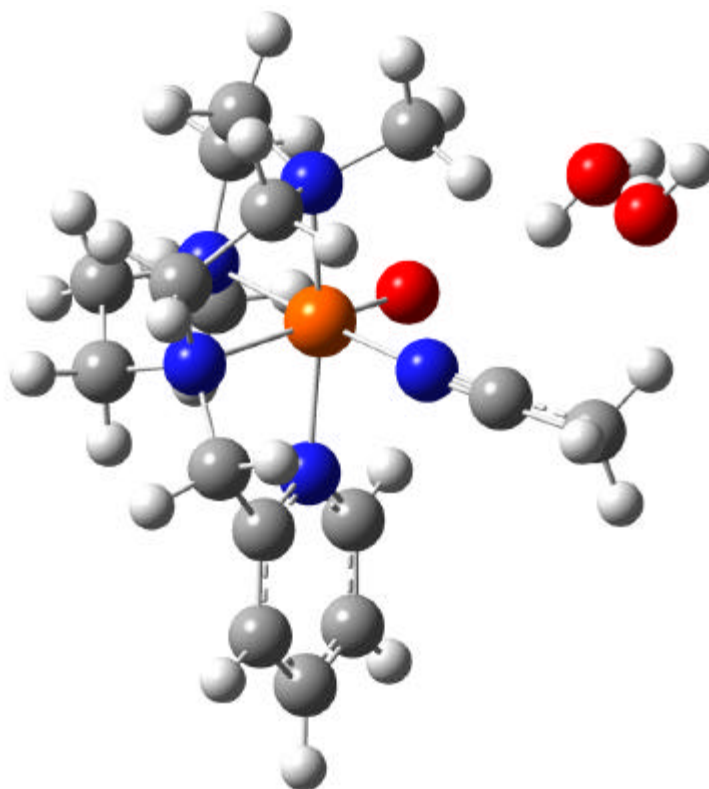

**Figure S16:** Structure of **11** calculated at the B3LYP level of theory in junction of the LanL2DZ basis set and associated ECP for Fe, and D95V basis set for the other atoms.

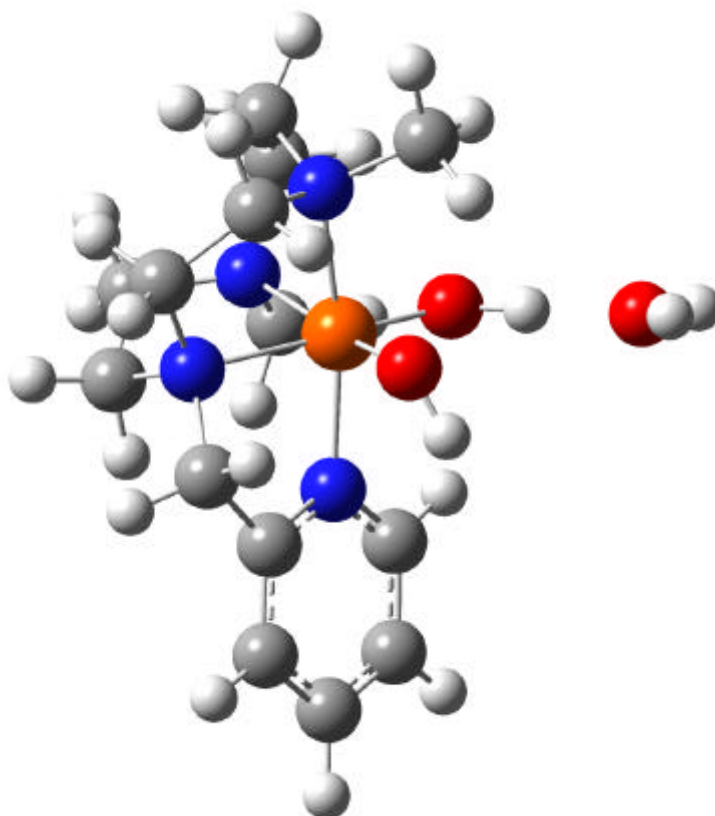

**Figure S17:** Structure of **I2** calculated at the B3LYP level of theory in junction of the LanL2DZ basis set and associated ECP for Fe, and D95V basis set for the other atoms.

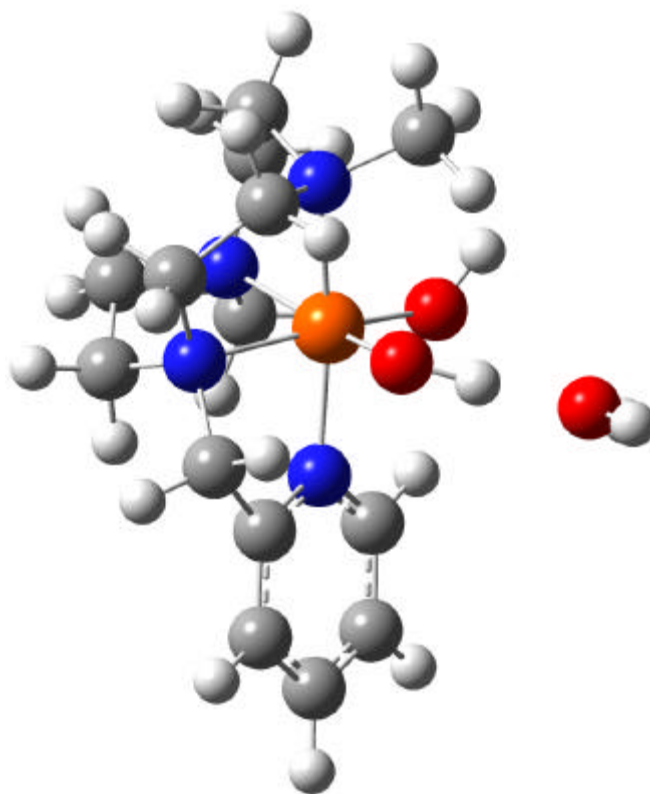

**Figure S18:** Structure of **TS1** calculated at the B3LYP level of theory in junction of the LanL2DZ basis set and associated ECP for Fe, and D95V basis set for the other atoms.

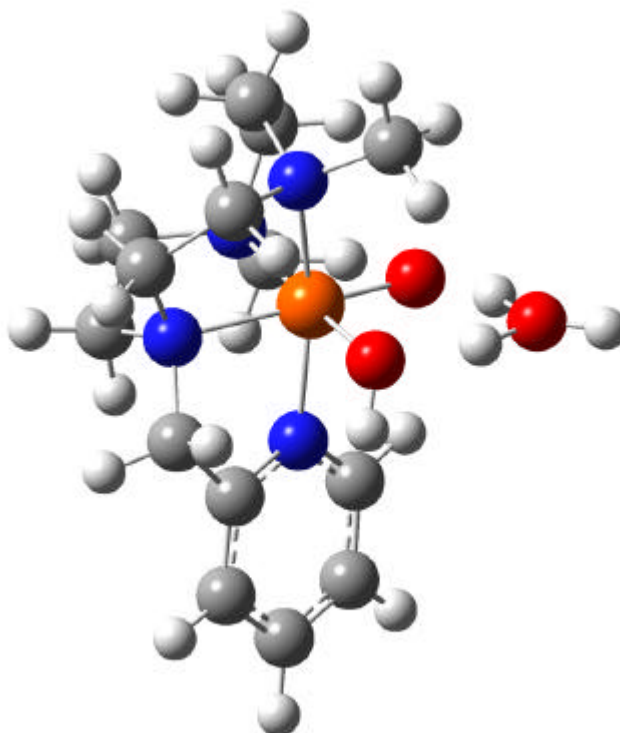

**Figure S19:** Structure of **TS2** calculated at the B3LYP level of theory in junction of the LanL2DZ basis set and associated ECP for Fe, and D95V basis set for the other atoms.

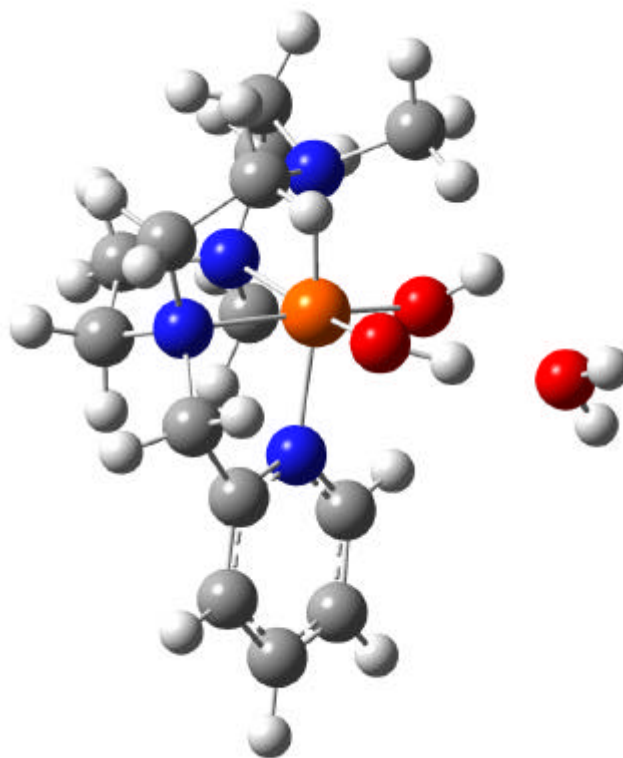

**Figure S20:** Structure of **TS3** calculated at the B3LYP level of theory in junction of the LanL2DZ basis set and associated ECP for Fe, and D95V basis set for the other atoms.

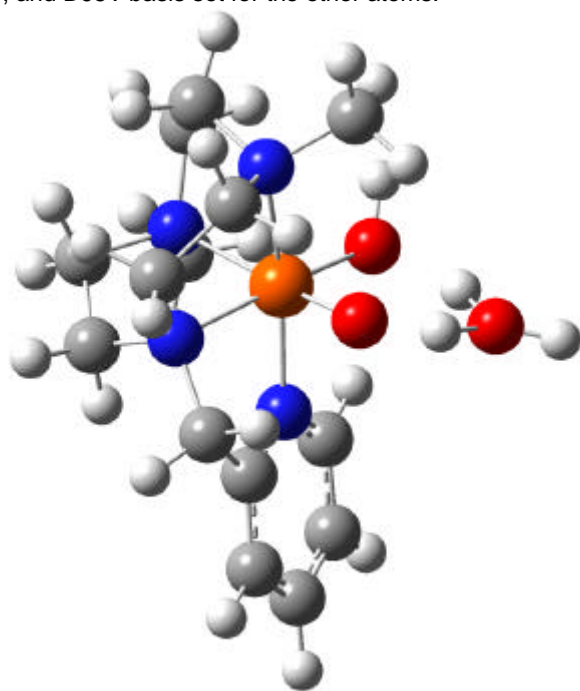

**Table S5:** Electronic energies, zero point energies, enthalpies and free energies (in kcal/mol) calculated for **2a**, **TS1**, **I1**, **TS2**, **I2**, **TS3** and **2b**.

|            | DE <sup>a</sup> | DE+ZPVA <sup>b</sup> | DH(298°K) <sup>c</sup> | DG(298°K) <sup>c</sup> |
|------------|-----------------|----------------------|------------------------|------------------------|
| <b>2a</b>  | 0.48            | 1.56                 | 1.33                   | 2.20                   |
| <b>TS1</b> | 11.19           | 9.83                 | 8.79                   | 11.53                  |
| <b>I1</b>  | 0.00            | 0.00                 | 0.00                   | 0.00                   |
| <b>TS2</b> | 3.71            | 3.49                 | 3.07                   | 4.22                   |
| <b>I2</b>  | 4.37            | 4.21                 | 4.21                   | 4.19                   |
| <b>TS3</b> | 13.34           | 11.42                | 10.47                  | 12.97                  |
| <b>2b</b>  | 2.99            | 3.88                 | 3.70                   | 4.31                   |

<sup>a</sup> The Electronic energies are computed at the B3LYP-D3 level in junction of the cc-pVTZ basis set for Fe, the atoms bond to Fe, and the H bond to oxygen atoms, and cc-pVDZ for the other atoms. The single point calculations include the Acetonitrile solvent effect computed through Gaussian09 PCM approach and the London dispersion effects calculated using the S. Grimme DFT-D3 method. The equilibrium geometries were calculated at the B3LYP level in junction of the LANL2DZ basis set and associated ECP for Fe, and D95V basis set for the other atoms.

<sup>b</sup> The zero point energies include the B3LYP-D3/cc-pVTZ&cc-pVDZ//B3LYP/LANL2DZ &D95V electronic energies together with zero-point vibrational corrections at the B3LYP/LANL2DZ&D95V level.

<sup>c</sup> The zero point energies include the B3LYP-D3/cc-pVTZ&cc-pVDZ//B3LYP/LANL2DZ &D95V electronic energies together with thermal enthalpic corrections at the B3LYP/LANL2DZ&D95V level.

<sup>d</sup> The zero point energies include the B3LYP-D3/cc-pVTZ&cc-pVDZ//B3LYP/LANL2DZ &D95V electronic energies together with thermal free energy corrections at the B3LYP/LANL2DZ&D95V level.

**Table S6:** Electronic energies, zero point energies, enthalpies and free energies (in kcal/mol) calculated for  $[\text{Fe}^{\text{IV}}(\text{O})(^{\text{Me,H}}\text{Pytacn})(\text{H}_2\text{O})]^{2+} + \text{H}_2\text{O} + \text{CH}_3\text{CN}$  and  $[\text{Fe}^{\text{IV}}(\text{O})(^{\text{Me,H}}\text{Pytacn})(\text{CH}_3\text{CN})]^{2+} + 2\text{H}_2\text{O}$ .

|                                                                                                                                       | DE <sup>a</sup> | DE+ZPVA <sup>b</sup> | DH(298°K) <sup>c</sup> | DG(298°K) <sup>c</sup> |
|---------------------------------------------------------------------------------------------------------------------------------------|-----------------|----------------------|------------------------|------------------------|
| $[\text{Fe}^{\text{IV}}(\text{O})(^{\text{Me,H}}\text{Pytacn})(\text{H}_2\text{O})]^{2+} + \text{H}_2\text{O} + \text{CH}_3\text{CN}$ | 0.00            | 0.00                 | 0.00                   | 0.00                   |
| $[\text{Fe}^{\text{IV}}(\text{O})(^{\text{Me,H}}\text{Pytacn})(\text{CH}_3\text{CN})]^{2+} + 2\text{H}_2\text{O}$                     | 17.2            | 15.5                 | 15.7                   | 16.1                   |

<sup>a</sup> The Electronic energies are computed at the B3LYP-D3 level in junction of the cc-pVTZ basis set for Fe, the atoms bond to Fe, and the H bond to oxygen atoms, and cc-pVDZ for the other atoms. The equilibrium geometries were calculated at the B3LYP level in junction of the SDD basis set and associated ECP for Fe, 6-311G(d) basis set for the atoms bond to Fe, and 6-31G basis set for the other atoms..

<sup>b</sup> The zero point energies include the B3LYP/cc-pVTZ&cc-pVDZ//B3LYP/SDD&6-311G(d)&6-31G electronic energies together with zero-point vibrational corrections at the B3LYP/LANL2DZ&D95V level.

<sup>c</sup> The zero point energies include the B3LYP/cc-pVTZ&cc-pVDZ//B3LYP/SDD&6-311G(d)&6-31G electronic energies together with thermal enthalpic corrections at the B3LYP/LANL2DZ&D95V level.

<sup>d</sup> The zero point energies include the B3LYP/cc-pVTZ&cc-pVDZ//B3LYP/SDD&6-311G(d)&6-31G electronic energies together with thermal free energy corrections at the B3LYP/LANL2DZ&D95V level.

**Table S7.** Energies (in kcal/mol) for **2a**, **TS1**, **I1**, **TS2**, **2c**, **TS3**, and **2b** calculated at B3LYP/LANL2DZ &D95V level for S=0, 1, and 2.

|            | S=0   | S=1   | S=2   |
|------------|-------|-------|-------|
| <b>2a</b>  | 10.38 | 0.00  | 12.90 |
| <b>TS1</b> | 36.05 | 8.64  | 26.23 |
| <b>I1</b>  | 15.41 | 2.38  | 23.53 |
| <b>TS2</b> | 36.35 | 7.24  | 25.38 |
| <b>I2</b>  | 17.20 | 7.04  | 27.65 |
| <b>TS3</b> | 39.58 | 10.27 | 29.95 |
| <b>2b</b>  | 12.63 | 1.89  | 17.55 |



Tables S8-S16 show the optimized structures Cartesian xyz coordinates in Ångstroms for all structures studied in this work at the B3LYP level

**Table S8:** Optimized Cartesian xyz coordinates of **2a** calculated at the B3LYP level of theory in junction of the SDD basis set and associated ECP for Fe, 6-311G(d) basis set for the atoms bond to Fe, and 6-31G basis set for the other atoms.

|    |               |               |               |
|----|---------------|---------------|---------------|
| H  | 0.5409464504  | 1.8419410914  | 3.1055346569  |
| H  | 2.8554752053  | 2.4170368879  | 1.3552921891  |
| H  | 1.842799948   | 0.7367322331  | 2.7455774001  |
| C  | 0.8465891149  | 1.0403300917  | 2.4308756833  |
| H  | 3.2032867853  | -0.0243015133 | 1.4750182817  |
| H  | 0.0029727214  | -0.6601273501 | 3.468965621   |
| C  | 2.3517151007  | 1.7809432132  | 0.620318107   |
| H  | 1.8333365394  | -1.5613029625 | 2.3589143055  |
| H  | 4.0325921715  | 0.5589844572  | 0.0529986214  |
| C  | 0.1754590775  | 2.8587180749  | 0.9144874501  |
| C  | 3.0450689002  | 0.4343948985  | 0.4999234878  |
| N  | 0.9194585572  | 1.5686393576  | 1.0174602897  |
| C  | -0.1279959441 | -0.1193212167 | 2.5262178898  |
| H  | 2.3456939416  | 2.30100644    | -0.3369156578 |
| H  | -1.1506345395 | 0.2545566791  | 2.5072218134  |
| C  | 1.2641103818  | -1.9122874686 | 1.4982194313  |
| H  | 0.9799917066  | -2.9436184022 | 1.7199581152  |
| H  | 3.118896625   | -2.2687667223 | 0.4323618863  |
| N  | 0.0442734709  | -1.0444139819 | 1.3609890711  |
| N  | 2.2122667562  | -0.4914766461 | -0.350105906  |
| C  | 2.1168776919  | -1.8787716434 | 0.2258954024  |
| H  | -1.5869091146 | -2.2423390937 | 2.0725466124  |
| C  | 2.8204154609  | -0.5620148162 | -1.7146709508 |
| C  | -1.2292726118 | -1.7834544231 | 1.1450033979  |
| H  | 1.6693302134  | -2.5011244196 | -0.5466746786 |
| Fe | 0.2752344328  | 0.1704895046  | -0.3476577817 |
| H  | -1.0454487239 | -2.5935043948 | 0.4346137559  |
| C  | -2.2521072139 | -0.8070104369 | 0.5930667586  |
| N  | -1.7371848796 | 0.2528217903  | -0.0799308371 |
| H  | -4.014173159  | -1.8131534243 | 1.2932146945  |
| C  | -3.6229297718 | -0.9666099072 | 0.7419532776  |
| C  | -2.5627770871 | 1.160039692   | -0.6322316394 |
| H  | -2.087835229  | 1.9643943442  | -1.179043978  |
| C  | -4.4806960794 | -0.0229026288 | 0.17722513    |
| C  | -3.9425411826 | 1.0555591473  | -0.5192427201 |
| H  | -5.5536809241 | -0.1296993992 | 0.2834439029  |
| H  | -4.5762588631 | 1.806444719   | -0.9731743513 |
| H  | 2.2094747701  | -1.1699809726 | -2.3744195095 |
| H  | 3.8202658838  | -0.9989112723 | -1.644540128  |
| H  | 2.8861953947  | 0.4433212689  | -2.1256256882 |
| H  | -0.8531138607 | 2.713469033   | 1.2411466458  |
| H  | 0.186907056   | 3.1954257546  | -0.1192843191 |
| H  | 0.6483772439  | 3.6093811615  | 1.5535214937  |
| O  | -0.1790340973 | -1.3462500992 | -1.6636115926 |
| O  | 0.3866472017  | 1.2479510368  | -1.5558477454 |
| H  | -1.1197089657 | -1.5619457438 | -1.6975780365 |
| H  | 0.0423292044  | -1.0742597391 | -2.6080195744 |
| H  | 0.3318665046  | -1.1663951459 | -4.9087666167 |
| O  | 0.3916003855  | -0.6477302044 | -4.0978733778 |
| H  | 0.3976074031  | 0.2828061724  | -4.3501472737 |

**Table S9:** Optimized Cartesian xyz coordinates of **2b** calculated at the B3LYP level of theory in junction of the SDD basis set and associated ECP for Fe, 6-311G(d) basis set for the atoms bond to Fe, and 6-31G basis set for the other atoms.

|   |              |               |              |
|---|--------------|---------------|--------------|
| H | 0.751176646  | -2.7958561143 | 2.1592256479 |
| H | 2.9759587712 | -0.8507352932 | 2.5371749826 |

|    |               |               |               |
|----|---------------|---------------|---------------|
| H  | 2.0359591216  | -2.5065978951 | 1.0158245999  |
| C  | 1.0289446837  | -2.1968716289 | 1.2891295142  |
| H  | 3.3773926895  | -1.2812068868 | 0.1526176565  |
| H  | 0.2071315915  | -3.4550524922 | -0.275981273  |
| C  | 2.4313034903  | -0.2444149871 | 1.8043154392  |
| H  | 2.0115600966  | -2.45380049   | -1.2788580738 |
| H  | 4.1144061034  | 0.2495146141  | 0.5461773528  |
| C  | 0.2606667319  | -0.5064482361 | 2.8944750331  |
| C  | 3.1534292472  | -0.2620137874 | 0.4639672987  |
| N  | 1.0309764075  | -0.7356345753 | 1.6397535942  |
| C  | 0.0558223945  | -2.4608033499 | 0.1544082127  |
| H  | 2.3823035565  | 0.7683768016  | 2.2097388957  |
| H  | -0.9674297062 | -2.4151096469 | 0.5220756504  |
| C  | 1.444736847   | -1.6540904878 | -1.7547341043 |
| H  | 1.1681525527  | -2.0135709106 | -2.7475436102 |
| H  | 3.3072229375  | -0.6382079069 | -2.1887518748 |
| N  | 0.1989840696  | -1.4205699448 | -0.9290487352 |
| N  | 2.3109061714  | 0.3970860501  | -0.596202563  |
| C  | 2.2877962143  | -0.3825141905 | -1.8820299557 |
| H  | -1.3522311266 | -2.3802670468 | -2.0546000399 |
| C  | 2.8392549566  | 1.7644591173  | -0.8775810182 |
| C  | -1.0763738494 | -1.3766106313 | -1.7183605316 |
| H  | 1.8612971043  | 0.2775871813  | -2.6340249998 |
| Fe | 0.3009135408  | 0.3811268266  | -0.0915107623 |
| H  | -0.9150436143 | -0.7409233593 | -2.5902365257 |
| C  | -2.1417914374 | -0.7714818154 | -0.8321586863 |
| N  | -1.6761138922 | 0.0551039386  | 0.1353462877  |
| H  | -3.8481938105 | -1.6935571151 | -1.7484219291 |
| C  | -3.4975556327 | -1.0218168273 | -0.9745395967 |
| C  | -2.5368231508 | 0.6555583221  | 0.9731436356  |
| H  | -2.1089813416 | 1.3120101588  | 1.718756454   |
| C  | -4.3946133247 | -0.3961061609 | -0.1091779812 |
| C  | -3.9067269323 | 0.450122983   | 0.8815262976  |
| H  | -5.458958037  | -0.5738026966 | -0.2059566256 |
| H  | -4.57113591   | 0.9485064244  | 1.5752629209  |
| H  | 2.1530517703  | 2.2873929103  | -1.5392798838 |
| H  | 3.8255829212  | 1.6957764669  | -1.3449029151 |
| H  | 2.9481643085  | 2.3192433242  | 0.0552122662  |
| H  | -0.7404712075 | -0.9229487446 | 2.7905255511  |
| H  | 0.1805634995  | 0.5622219724  | 3.0840573798  |
| H  | 0.7555016616  | -0.9889857196 | 3.7427342047  |
| O  | -0.0107846511 | 1.2016159435  | -1.4615137403 |
| O  | 0.233849075   | 2.0605211753  | 1.0405357974  |
| H  | -0.3452358186 | 2.7403370161  | 0.5657852526  |
| H  | 1.0543417553  | 2.5181023547  | 1.2577402486  |
| O  | -1.303767667  | 3.6585789935  | -0.2725609728 |
| H  | -1.5694150536 | 4.5712932835  | -0.1094393827 |
| H  | -1.2554127476 | 3.5341981583  | -1.2279381478 |

**Table S10:** Optimized Cartesian xyz coordinates of  $[\text{Fe}^{\text{IV}}(\text{O})(^{\text{Me,H}}\text{Pytach})(\text{H}_2\text{O})]^{2+} + \text{H}_2\text{O} + \text{CH}_3\text{CN}$  calculated at the B3LYP level of theory in junction of the SDD basis set and associated ECP for Fe, 6-311G(d) basis set for the atoms bond to Fe, and 6-31G basis set for the other atoms.

|   |               |               |               |
|---|---------------|---------------|---------------|
| H | 0.8406493398  | 2.075375577   | 3.0506199065  |
| H | 3.0435747243  | 2.4017504594  | 1.1147993506  |
| H | 2.0372990426  | 0.8607632388  | 2.6786866806  |
| C | 1.043914484   | 1.2144329132  | 2.411039776   |
| H | 3.2735191095  | -0.0423328913 | 1.3865435011  |
| H | 0.1585841926  | -0.3517271249 | 3.6139187938  |
| C | 2.4562761724  | 1.7467379374  | 0.462919153   |
| H | 1.8451401722  | -1.4501084723 | 2.4727848352  |
| H | 4.0288861872  | 0.397245868   | -0.1245964594 |
| C | 0.3665270964  | 2.9641318347  | 0.8238399213  |
| C | 3.0696427055  | 0.3574115298  | 0.3939245999  |
| N | 1.0467728586  | 1.6444619272  | 0.9658308233  |
| C | 0.0050104781  | 0.1349317257  | 2.6453277142  |
| H | 2.4100296165  | 2.1975855985  | -0.5276272119 |
| H | -0.9901645685 | 0.5768245537  | 2.6587739263  |

|    |               |               |               |
|----|---------------|---------------|---------------|
| C  | 1.2096617997  | -1.8109500867 | 1.6637638883  |
| H  | 0.8724407228  | -2.8067991874 | 1.960401178   |
| H  | 2.9870467178  | -2.3394024275 | 0.5398188408  |
| N  | 0.0409473607  | -0.874288393  | 1.5386245367  |
| N  | 2.1357321292  | -0.576800517  | -0.3304127649 |
| C  | 1.9973452913  | -1.910241682  | 0.351790097   |
| H  | -1.6200428514 | -1.8973285802 | 2.4285634561  |
| C  | 2.6476559273  | -0.785478415  | -1.7198968612 |
| C  | -1.2938862243 | -1.5285342264 | 1.4505749239  |
| H  | 1.4781493572  | -2.5563717645 | -0.3526307361 |
| Fe | 0.2372541407  | 0.194604278   | -0.2695736504 |
| H  | -1.2276485863 | -2.3882138941 | 0.780727172   |
| C  | -2.274645593  | -0.5156553928 | 0.8945963052  |
| N  | -1.7340286261 | 0.4374092171  | 0.0993674525  |
| H  | -4.0473355558 | -1.3066676511 | 1.8066985449  |
| C  | -3.6375062933 | -0.5455804303 | 1.1543359299  |
| C  | -2.5260433455 | 1.355982076   | -0.4792862301 |
| H  | -2.0319801219 | 2.0693650447  | -1.125861922  |
| C  | -4.460431088  | 0.4136867567  | 0.5678652155  |
| C  | -3.8967071939 | 1.3764564118  | -0.2643150915 |
| H  | -5.5265722482 | 0.4095412988  | 0.7606008691  |
| H  | -4.5032230883 | 2.1350525133  | -0.7416813386 |
| H  | 1.9547384036  | -1.3968170883 | -2.2883901044 |
| H  | 3.6220123978  | -1.2802315265 | -1.67722709   |
| H  | 2.7473753693  | 0.1812316618  | -2.2089231224 |
| H  | -0.6427279744 | 2.8995253156  | 1.228029983   |
| H  | 0.3201795941  | 3.2285572608  | -0.2297519659 |
| H  | 0.9213992063  | 3.7292809229  | 1.3738824146  |
| O  | -0.3160561899 | -1.3666377108 | -1.4286625394 |
| O  | 0.3445576482  | 1.1916045986  | -1.5484469213 |
| H  | -1.1750331157 | -1.8468846424 | -1.3564991905 |
| H  | -0.2445804844 | -1.0873784968 | -2.3843333797 |
| H  | -0.2497498832 | -0.8395981973 | -4.7645226585 |
| O  | 0.0183922813  | -0.5235877119 | -3.8949504113 |
| H  | 0.0895093644  | 0.4367792025  | -3.9404263471 |
| N  | -2.5771602314 | -2.9947453364 | -1.4770263068 |
| C  | -3.309905737  | -3.7981200732 | -1.8576233316 |
| C  | -4.232989658  | -4.8109837809 | -2.3394006783 |
| H  | -3.7201588307 | -5.4796697332 | -3.0340066988 |
| H  | -4.6156380596 | -5.3975139401 | -1.5015354992 |
| H  | -5.0709433727 | -4.3375721278 | -2.8552306877 |

**Table S11:** Optimized Cartesian xyz coordinates of  $[\text{Fe}^{\text{IV}}(\text{O})(^{\text{Me,H}}\text{Pytacn})(\text{CH}_3\text{CN})]^{2+} + 2\text{H}_2\text{O}$  calculated at the B3LYP level of theory in junction of the SDD basis set and associated ECP for Fe, 6-311G(d) basis set for the atoms bond to Fe, and 6-31G basis set for the other atoms.

|   |               |               |               |
|---|---------------|---------------|---------------|
| H | -2.1570337973 | -3.365111857  | 0.7071030035  |
| H | 0.6541344208  | -3.8142241232 | 1.4877733149  |
| H | -0.829588173  | -3.6022317318 | -0.4009034445 |
| C | -1.4066554972 | -2.8380595189 | 0.1151307867  |
| H | 1.0970011042  | -3.3728744698 | -0.9007682842 |
| H | -2.5419332296 | -2.4752538102 | -1.6909697952 |
| C | 0.8208837868  | -2.7798709359 | 1.1699436316  |
| H | -0.3714365894 | -2.6034411103 | -2.4583976873 |
| H | 2.583341501   | -3.0929183265 | -0.0255226588 |
| C | -1.1225372759 | -1.9164975392 | 2.3753742737  |
| C | 1.5626733287  | -2.7300859282 | -0.1544781314 |
| N | -0.4904804286 | -2.0641739912 | 1.031627114   |
| C | -2.0825295296 | -1.9089999125 | -0.874603935  |
| H | 1.3860494198  | -2.2686358782 | 1.9481437334  |
| H | -2.876964285  | -1.3536393443 | -0.378725428  |
| C | -0.1878992094 | -1.5289690421 | -2.4447692891 |
| H | -0.4365351786 | -1.1637020445 | -3.4437461463 |
| H | 1.9289285261  | -1.9254846916 | -2.6940940158 |
| N | -1.0987480951 | -0.916220144  | -1.4166698279 |
| N | 1.5906870873  | -1.3136625493 | -0.6707593584 |
| C | 1.2855427261  | -1.2334800446 | -2.1408344373 |
| H | -2.6782163318 | 0.0101258031  | -2.5321963627 |

|    |               |               |               |
|----|---------------|---------------|---------------|
| C  | 2.9513802721  | -0.7399335053 | -0.4137057964 |
| C  | -1.8508821541 | 0.2876747561  | -1.8710751435 |
| H  | 1.5467694778  | -0.2250051386 | -2.4555908076 |
| Fe | 0.0708246917  | -0.2564631024 | 0.2029108637  |
| H  | -1.1754052291 | 0.9320615543  | -2.4367274288 |
| C  | -2.3528137428 | 1.0165822837  | -0.6413073944 |
| N  | -1.6311818208 | 0.8144679337  | 0.4864762108  |
| H  | -4.0354649373 | 1.9865367636  | -1.5539887426 |
| C  | -3.4618539333 | 1.8506883594  | -0.6451760251 |
| C  | -1.9694971019 | 1.4498335287  | 1.6209281403  |
| H  | -1.3317886578 | 1.2694636203  | 2.4763901225  |
| C  | -3.8223975455 | 2.5040413897  | 0.532438154   |
| C  | -3.064357276  | 2.3008921438  | 1.6818931341  |
| H  | -4.684649832  | 3.15985414    | 0.5502705965  |
| H  | -3.3103978398 | 2.7921171053  | 2.6143703238  |
| H  | 3.0050587901  | 0.3032660128  | -0.7123642702 |
| H  | 3.6902430005  | -1.318553826  | -0.9758846928 |
| H  | 3.1723841933  | -0.7950866848 | 0.649694517   |
| H  | -2.0970162892 | -1.4413149826 | 2.2723911466  |
| H  | -0.482292946  | -1.3036522353 | 3.0052347612  |
| H  | -1.2552293314 | -2.9014352212 | 2.8313858687  |
| O  | 0.8181896188  | 0.1676279945  | 1.588056496   |
| N  | 0.6972534539  | 1.4321594436  | -0.717163544  |
| C  | 1.1001010421  | 2.4794832397  | -0.9741872812 |
| C  | 1.6387761942  | 3.7859304372  | -1.2758194789 |
| H  | 1.6625988145  | 3.9450962314  | -2.3563511119 |
| H  | 1.0276714137  | 4.5604786325  | -0.8071484103 |
| H  | 2.6588810104  | 3.7961752254  | -0.8727621108 |
| O  | 3.5105401309  | 1.0647807271  | 2.2666804268  |
| H  | 3.8483362847  | 1.2600663797  | 3.147263706   |
| H  | 2.5544499494  | 0.9445266122  | 2.3528557699  |
| H  | 3.9882519573  | 2.0091021212  | 0.7624234073  |
| O  | 4.0390328779  | 2.3419628921  | -0.1545123535 |
| H  | 4.9759938967  | 2.4633899079  | -0.339719293  |

**Table S12:** Optimized Cartesian xyz coordinates of **I1** calculated at the B3LYP level of theory in junction of the LanL2DZ basis set and associated ECP for Fe, and D95V basis set for the other atoms.

|    |               |               |               |
|----|---------------|---------------|---------------|
| H  | 0.4414919007  | -2.5097842738 | 2.6052134617  |
| H  | 2.834918208   | -0.6928593462 | 2.6469067908  |
| H  | 1.7480452568  | -2.5355576622 | 1.4364399198  |
| C  | 0.7647610015  | -2.1060588275 | 1.6395401463  |
| H  | 3.1973072704  | -1.5399638909 | 0.3498435559  |
| H  | -0.1533179791 | -3.5525142141 | 0.2942544797  |
| C  | 2.3373372951  | -0.1689109378 | 1.8192106241  |
| H  | 1.7563615357  | -2.8203210047 | -0.8596222484 |
| H  | 4.0357941248  | -0.0036961474 | 0.488113975   |
| C  | 0.1200305465  | -0.069243336  | 2.9134520721  |
| C  | 3.0438860176  | -0.4672491661 | 0.4937972017  |
| N  | 0.8841132366  | -0.5929690832 | 1.7250414552  |
| C  | -0.2370343332 | -2.4888365335 | 0.552882582   |
| H  | 2.3446598575  | 0.9023340033  | 2.0317579136  |
| H  | -1.2572152    | -2.3121715525 | 0.9009641739  |
| C  | 1.2159285219  | -2.0910969345 | -1.4696001389 |
| H  | 0.9031324717  | -2.6103379231 | -2.382343767  |
| H  | 3.1155678774  | -1.2504913586 | -2.1211977611 |
| N  | -0.008086185  | -1.6353651627 | -0.6828739158 |
| N  | 2.2238130736  | 0.0759813497  | -0.6703941093 |
| C  | 2.1149962986  | -0.8993291676 | -1.8351708469 |
| H  | -1.6689861375 | -2.6065177271 | -1.6641458506 |
| C  | 2.8295529504  | 1.3715495796  | -1.164202437  |
| C  | -1.282329796  | -1.5931444089 | -1.4993662748 |
| H  | 1.688904802   | -0.3355205841 | -2.6657345965 |
| Fe | 0.2886179591  | 0.3218980256  | -0.0850791044 |
| H  | -1.0498847914 | -1.1441037106 | -2.4694295695 |
| C  | -2.276099019  | -0.7333933283 | -0.7408212788 |
| N  | -1.7061560843 | 0.2045268248  | 0.0841521161  |
| H  | -4.1069765333 | -1.5961160878 | -1.4935837713 |

|   |               |               |               |
|---|---------------|---------------|---------------|
| C | -3.666975824  | -0.8450651313 | -0.844887391  |
| C | -2.4830206254 | 1.0536580548  | 0.8085498546  |
| H | -1.9650409606 | 1.7801489408  | 1.4226802614  |
| C | -4.4825982736 | 0.0305323506  | -0.0985599743 |
| C | -3.8823480806 | 0.9891664028  | 0.7398797282  |
| H | -5.5639059232 | -0.0375438897 | -0.1693717166 |
| H | -4.4808662891 | 1.6768276232  | 1.3273915837  |
| H | 2.1581962761  | 1.8161960733  | -1.8982099425 |
| H | 3.8044081611  | 1.1645755252  | -1.6238986864 |
| H | 2.9614862394  | 2.0533745904  | -0.3218185443 |
| H | -0.910941381  | -0.4305419545 | 2.8788835475  |
| H | 0.1285232739  | 1.0210885658  | 2.88827014    |
| H | 0.5848376233  | -0.4188998764 | 3.844410581   |
| O | 0.0076731484  | 0.9879891051  | -1.7658145007 |
| O | 0.4791708064  | 1.8529177357  | 0.7195150888  |
| H | -0.8623463363 | 1.4199118562  | -1.9105466836 |
| H | 0.4611639245  | 4.3844628033  | -1.3290887199 |
| H | 0.3784845232  | 4.9336553714  | 0.1846112338  |
| O | 0.3963120097  | 4.1420588237  | -0.3866710691 |
| H | 0.4545751864  | 2.7506026711  | 0.2053687748  |

**Table S13:** Optimized Cartesian xyz coordinates of **I2** calculated at the B3LYP level of theory in junction of the LanL2DZ basis set and associated ECP for Fe, and D95V basis set for the other atoms.

|    |               |               |               |
|----|---------------|---------------|---------------|
| H  | -0.9245950194 | -3.4541224168 | -0.8818138712 |
| H  | -3.0199763085 | -1.6969662355 | -2.0571881898 |
| H  | -2.1733765661 | -2.6537579156 | 0.055807681   |
| C  | -1.1507760809 | -2.5465101412 | -0.3115537623 |
| H  | -3.4454248949 | -1.0823796439 | 0.3062939895  |
| H  | -0.3784446178 | -3.1104626118 | 1.6459367755  |
| C  | -2.4485100263 | -0.8642830335 | -1.624597363  |
| H  | -2.0923932115 | -1.6348954712 | 2.1691353747  |
| H  | -4.0939226229 | 0.2013498359  | -0.6989833076 |
| C  | -0.2543063728 | -1.6467435322 | -2.453910908  |
| C  | -3.1655452099 | -0.2959205972 | -0.3991884991 |
| N  | -1.0647401699 | -1.3306052221 | -1.2200577955 |
| C  | -0.1653428839 | -2.392342816  | 0.8436574172  |
| H  | -2.3236384412 | -0.1038725803 | -2.4000089251 |
| H  | 0.8532386056  | -2.578010101  | 0.4960357118  |
| C  | -1.4592891263 | -0.7460444859 | 2.2470810778  |
| H  | -1.1722112588 | -0.6543654668 | 3.3004092226  |
| H  | -3.2629362708 | 0.4727753455  | 2.2025008766  |
| N  | -0.223146878  | -0.9741507598 | 1.3876600204  |
| N  | -2.2525238841 | 0.6987731744  | 0.3079014367  |
| C  | -2.233069315  | 0.5196696814  | 1.8235076423  |
| H  | 1.3697385207  | -1.4502704532 | 2.7715607109  |
| C  | -2.6982178805 | 2.1079220175  | -0.0105638515 |
| C  | 1.1007678547  | -0.6612239545 | 2.0586169581  |
| H  | -1.751267894  | 1.4094584685  | 2.2290088633  |
| Fe | -0.2784243057 | 0.3482971959  | -0.1694358614 |
| H  | 0.9949929005  | 0.287082965   | 2.5934422436  |
| C  | 2.1437738063  | -0.5140946431 | 0.9633842124  |
| N  | 1.654176674   | -0.1129836803 | -0.2540674361 |
| H  | 3.8975895167  | -1.0475014795 | 2.1048855094  |
| C  | 3.5150715827  | -0.7228264695 | 1.1422763768  |
| C  | 2.4835813226  | 0.1235520901  | -1.3015074238 |
| H  | 2.0178044028  | 0.4859646937  | -2.2102535455 |
| C  | 4.3892174289  | -0.4970266029 | 0.0579758588  |
| C  | 3.8676398764  | -0.0684655033 | -1.1775002699 |
| H  | 5.4573616818  | -0.6506030202 | 0.1787320073  |
| H  | 4.5147272497  | 0.1191681592  | -2.0273799811 |
| H  | -1.9587671629 | 2.8194674468  | 0.3587874069  |
| H  | -3.6654343578 | 2.306648183   | 0.468251767   |
| H  | -2.8256658848 | 2.2255921387  | -1.0909074215 |
| H  | 0.7044568238  | -2.0838083754 | -2.1655442233 |
| H  | -0.0839364388 | -0.7232152944 | -3.0088424207 |
| H  | -0.7958965339 | -2.3656839434 | -3.0821330803 |
| O  | 0.1368615576  | 1.6851234804  | 0.8828676844  |

|   |               |              |               |
|---|---------------|--------------|---------------|
| O | -0.1695772777 | 1.2716673554 | -1.7361372983 |
| H | 1.436235862   | 3.9244427245 | -1.00023989   |
| H | -0.8470574515 | 1.9542055793 | -1.9316396274 |
| O | 1.1075890513  | 3.8134550748 | -0.0890572558 |
| H | 1.3015507876  | 4.593466145  | 0.4646425576  |
| H | 0.5609638314  | 2.5313923028 | 0.4573327685  |

**Table S14:** Optimized Cartesian xyz coordinates of **TS1** calculated at the B3LYP level of theory in junction of the LanL2DZ basis set and associated ECP for Fe, and D95V basis set for the other atoms.

|    |           |           |           |
|----|-----------|-----------|-----------|
| H  | 0.498471  | -3.043313 | 1.929276  |
| H  | 2.839583  | -1.259169 | 2.462486  |
| H  | 1.806006  | -2.747704 | 0.797340  |
| C  | 0.813413  | -2.405067 | 1.096822  |
| H  | 3.228385  | -1.497038 | 0.024816  |
| H  | -0.075517 | -3.481531 | -0.572715 |
| C  | 2.344628  | -0.550597 | 1.784668  |
| H  | 1.814926  | -2.446299 | -1.495471 |
| H  | 4.049206  | -0.038545 | 0.554533  |
| C  | 0.118175  | -0.774299 | 2.841108  |
| C  | 3.062762  | -0.497796 | 0.435414  |
| N  | 0.900426  | -0.958577 | 1.562864  |
| C  | -0.179806 | -2.518888 | -0.055179 |
| H  | 2.331627  | 0.433153  | 2.259617  |
| H  | -1.202304 | -2.454262 | 0.323049  |
| C  | 1.264743  | -1.592018 | -1.899661 |
| H  | 0.970248  | -1.861182 | -2.920309 |
| H  | 3.149669  | -0.579631 | -2.295036 |
| N  | 0.031079  | -1.375952 | -1.033475 |
| N  | 2.236148  | 0.315444  | -0.555405 |
| C  | 2.143220  | -0.331095 | -1.931838 |
| H  | -1.622475 | -2.124546 | -2.203468 |
| C  | 2.855292  | 1.687542  | -0.705721 |
| C  | -1.249313 | -1.170840 | -1.808892 |
| H  | 1.709306  | 0.421752  | -2.591350 |
| Fe | 0.290102  | 0.367038  | 0.070209  |
| H  | -1.039721 | -0.520487 | -2.664702 |
| C  | -2.256453 | -0.537223 | -0.861256 |
| N  | -1.703740 | 0.165530  | 0.182158  |
| H  | -4.069381 | -1.205090 | -1.826964 |
| C  | -3.645127 | -0.637445 | -1.004378 |
| C  | -2.500804 | 0.792342  | 1.087715  |
| H  | -2.000226 | 1.349469  | 1.870616  |
| C  | -4.479807 | 0.006027  | -0.066878 |
| C  | -3.898879 | 0.727971  | 0.992614  |
| H  | -5.559439 | -0.057938 | -0.162333 |
| H  | -4.510661 | 1.236002  | 1.730177  |
| H  | 2.247415  | 2.292581  | -1.376056 |
| H  | 3.864054  | 1.586061  | -1.125874 |
| H  | 2.914972  | 2.168811  | 0.272135  |
| H  | -0.904468 | -1.134274 | 2.705183  |
| H  | 0.104766  | 0.284968  | 3.099302  |
| H  | 0.588944  | -1.346095 | 3.651043  |
| O  | -0.044722 | 1.564030  | -1.419242 |
| O  | 0.420281  | 1.635682  | 1.190911  |
| H  | -0.951286 | 1.520509  | -1.788205 |
| H  | 0.112415  | 2.957455  | -0.929634 |
| H  | 0.198359  | 4.566036  | -0.105763 |
| O  | 0.250558  | 3.597520  | -0.108610 |
| H  | 0.355891  | 2.842672  | 0.728178  |

**Table S15:** Optimized Cartesian xyz coordinates of **TS2** calculated at the B3LYP level of theory in junction of the LanL2DZ basis set and associated ECP for Fe, and D95V basis set for the other atoms.

|   |              |               |              |
|---|--------------|---------------|--------------|
| H | 0.7268779851 | -3.387737869  | 1.204607311  |
| H | 2.922171162  | -1.6210738006 | 2.2265916726 |
| H | 2.0344650653 | -2.7528787554 | 0.2221673192 |

|    |               |               |               |
|----|---------------|---------------|---------------|
| C  | 1.0139510513  | -2.5535845495 | 0.5551985945  |
| H  | 3.3674672346  | -1.2735932649 | -0.1953360763 |
| H  | 0.2561324278  | -3.2612764158 | -1.3605132005 |
| C  | 2.3914442346  | -0.8124982263 | 1.705717564   |
| H  | 2.0224048507  | -1.9135494084 | -2.0093033348 |
| H  | 4.0845016106  | 0.0688127913  | 0.6793806952  |
| C  | 0.1665734268  | -1.4063336114 | 2.6018719601  |
| C  | 3.1314505629  | -0.4090706749 | 0.4298809172  |
| N  | 0.9863774194  | -1.2536981397 | 1.3441209371  |
| C  | 0.0570548435  | -2.4638540871 | -0.6330207413 |
| H  | 2.2968499685  | 0.0343098954  | 2.3898684488  |
| H  | -0.9742011413 | -2.5782759754 | -0.2928846151 |
| C  | 1.4259635496  | -1.0117668387 | -2.1759163219 |
| H  | 1.145551003   | -1.0092349181 | -3.2350488107 |
| H  | 3.2696040672  | 0.146769933   | -2.2341643482 |
| N  | 0.1809178745  | -1.1054200631 | -1.3050153082 |
| N  | 2.2647053994  | 0.5577091242  | -0.3684354966 |
| C  | 2.2416712133  | 0.2570940569  | -1.8630711376 |
| H  | -1.4202921955 | -1.6231219993 | -2.6641293035 |
| C  | 2.7714149029  | 1.9668038654  | -0.1583599621 |
| C  | -1.1249741485 | -0.7922760572 | -2.0116007656 |
| H  | 1.7871273829  | 1.1252934362  | -2.3409580131 |
| Fe | 0.2824054808  | 0.3402913328  | 0.1394106593  |
| H  | -0.9772808981 | 0.1074213974  | -2.6159438428 |
| C  | -2.1679158887 | -0.5186334505 | -0.9415070438 |
| N  | -1.6681452498 | -0.0501897966 | 0.2474325562  |
| H  | -3.9367201471 | -1.0594485694 | -2.0558855611 |
| C  | -3.5459585591 | -0.6814579879 | -1.1163411412 |
| C  | -2.4924856159 | 0.2966096536  | 1.2683022575  |
| H  | -2.0181087835 | 0.7037468197  | 2.1532536138  |
| C  | -4.4154198085 | -0.3403384524 | -0.0588719933 |
| C  | -3.8825680094 | 0.1541138152  | 1.1470831818  |
| H  | -5.4885199854 | -0.4565949796 | -0.1773380389 |
| H  | -4.5254979761 | 0.4294362983  | 1.9760143184  |
| H  | 2.0789887195  | 2.6775094784  | -0.6107095959 |
| H  | 3.757953183   | 2.0750640326  | -0.6266586986 |
| H  | 2.8727731723  | 2.1685594855  | 0.9110103732  |
| H  | -0.8127983427 | -1.8235046241 | 2.3572778646  |
| H  | 0.0464639091  | -0.4255727311 | 3.06469156    |
| H  | 0.6754316378  | -2.0847174017 | 3.2988420946  |
| O  | -0.0927896205 | 1.6206631719  | -1.0212848393 |
| O  | 0.2505215825  | 1.4097106054  | 1.6036020076  |
| H  | -1.3645527468 | 4.1451282993  | 0.6173849874  |
| H  | 0.6748531146  | 2.2934485512  | 1.5382234972  |
| O  | -0.7001263919 | 3.9501857583  | -0.0711747867 |
| H  | -0.5279038625 | 4.7426574397  | -0.6168184609 |
| H  | -0.4104209032 | 2.5176510233  | -0.6441494501 |

**Table S16:** Optimized Cartesian xyz coordinates of **TS3** calculated at the B3LYP level of theory in junction of the LanL2DZ basis set and associated ECP for Fe, and D95V basis set for the other atoms.

|   |           |           |           |
|---|-----------|-----------|-----------|
| H | 0.764033  | -2.988855 | 1.905681  |
| H | 2.955169  | -1.073585 | 2.470295  |
| H | 2.053632  | -2.584721 | 0.788441  |
| C | 1.035602  | -2.319555 | 1.081985  |
| H | 3.403715  | -1.219827 | 0.052130  |
| H | 0.249594  | -3.443143 | -0.610344 |
| C | 2.418625  | -0.381023 | 1.806863  |
| H | 2.033534  | -2.279109 | -1.529439 |
| H | 4.098759  | 0.289907  | 0.611736  |
| C | 0.192130  | -0.759132 | 2.824436  |
| C | 3.151960  | -0.242237 | 0.470937  |
| N | 1.007460  | -0.873451 | 1.557882  |
| C | 0.063084  | -2.500452 | -0.080061 |
| H | 2.355897  | 0.578588  | 2.329212  |
| H | -0.964095 | -2.525642 | 0.288760  |
| C | 1.439460  | -1.442949 | -1.909365 |
| H | 1.163137  | -1.691614 | -2.939757 |

|    |           |           |           |
|----|-----------|-----------|-----------|
| H  | 3.289035  | -0.342966 | -2.231878 |
| N  | 0.184830  | -1.333147 | -1.048197 |
| N  | 2.278746  | 0.512011  | -0.522918 |
| C  | 2.261024  | -0.138206 | -1.903682 |
| H  | -1.399034 | -2.174604 | -2.257415 |
| C  | 2.771988  | 1.934646  | -0.659322 |
| C  | -1.114168 | -1.208220 | -1.823577 |
| H  | 1.818384  | 0.592106  | -2.581877 |
| Fe | 0.288954  | 0.390783  | -0.003635 |
| H  | -0.960527 | -0.485113 | -2.630204 |
| C  | -2.164690 | -0.692135 | -0.856563 |
| N  | -1.669360 | 0.044651  | 0.189365  |
| H  | -3.921924 | -1.496726 | -1.819418 |
| C  | -3.539644 | -0.907443 | -0.991760 |
| C  | -2.503643 | 0.595949  | 1.107172  |
| H  | -2.040889 | 1.188687  | 1.886644  |
| C  | -4.417260 | -0.343515 | -0.041981 |
| C  | -3.892050 | 0.414448  | 1.021245  |
| H  | -5.488634 | -0.495138 | -0.131969 |
| H  | -4.539537 | 0.861857  | 1.767417  |
| H  | 2.064921  | 2.510549  | -1.257162 |
| H  | 3.754777  | 1.942224  | -1.147387 |
| H  | 2.875184  | 2.393573  | 0.328013  |
| H  | -0.786906 | -1.219629 | 2.674512  |
| H  | 0.056631  | 0.294378  | 3.072950  |
| H  | 0.701326  | -1.273552 | 3.649625  |
| O  | -0.066641 | 1.341309  | -1.380171 |
| O  | 0.186657  | 1.868269  | 1.208734  |
| H  | -0.548981 | 2.962642  | 0.513665  |
| H  | 1.016529  | 2.186798  | 1.616632  |
| O  | -0.926070 | 3.310149  | -0.398791 |
| H  | -1.294571 | 4.190980  | -0.569310 |
| H  | -0.599774 | 2.472239  | -1.104107 |

## 8. References

1. Company, A.; Gómez, L.; Güell, M.; Ribas, X.; Luis, J. M.; Que, L., Jr.; Costas, M. *J. Am. Chem. Soc.* **2007**, *129*, 15766-15767.
2. Goto, Y.; Matsui, T.; Ozaki, S.-i.; Watanabe, Y.; Fukuzumi, S. *J. Am. Chem. Soc.* **1999**, *121*, 9497-9502.
3. Sastri, C. V.; Lee, J.; Oh, K.; Lee, Y. J.; Lee, J.; Jackson, T. A.; Ray, K.; Hirao, H.; Shin, W.; Halfen, J. A.; Kim, J.; Que, L. J.; Shaik, S.; Nam, W. *Proc. Natl. Acad. Sci. USA* **2007**, *104*, 19181-18186.
4. Fukuzumi, S.; Fujioka, M.; Kotani, H.; Ohkubo, K.; Lee, Y.; Nam, W. *J. Am. Chem. Soc.* **2009**, *131*, 17127-17134.
